# Supplementary material for: AccessLab: Workshops to broaden access to scientific research
Source: PLoS Biol. 2019 May 28;17(5):e3000258. doi: 10.1371/journal.pbio.3000258 (PMC6538137; doi:10.1371/journal.pbio.3000258)
Supplement: S1 Data — (XLSX) [file pbio.3000258.s001.xlsx]

## Sheet: Sheet1
Information source	Workshop 1 – Penryn			Workshop 2 – Redruth			Workshop 3 – Penzance			Workshop 4 – Exeter			Workshop 5 – Plymouth
	Non-science question (Brexit)	Science question (Leprosy)		Non-science question (Brexit)	Science question (Marine plastics)		Non-science question (Brexit)	Science question (Marine plastics)		Non-science question (Brexit)	Science question (Extreme weather)		Non-science question (Brexit)	Science question (Marine plastics)
	Science researchers	Science researchers	Artists	Science researchers	Science researchers	Councillors/Community activists	Science researchers	Science researchers	Councillors/Community activists	Science researchers	Science researchers	Journalists/media	Science researchers	Science researchers	Policy	TOTAL	Total science researchers – non science question	Total science researchers – science question	Total non academic science researcher group – science question
Academic literature	4	10	1	0	13	1	1	7	2	5	3	0	0	12	3	62	10	45	7
Environmental organisation/charity	0	0	0	0	7	13	0	7	16	0	0	2	0	4	9	58	0	18	40
Friends/family/colleagues	10	7	6	12	6	3	15	5	1	3	6	1	6	4	1	86	46	28	12
Mass media news/documentaries	15	0	0	16	5	2	11	4	1	7	6	3	20	7	5	102	69	22	11
Government/UN information	3	0	0	1	3	2	5	2	1	4	5	4	5	11	2	48	18	21	9
Social media	7	0	0	9	2	3	7	4	0	2	0	0	6	3	1	44	31	9	4
Random online search	1	2	2	1	2	2	1	1	5	0	2	5	1	5	3	33	4	12	17
University research websites	0	0	0	0	2	3	0	2	2	2	0	0	0	4	2	17	2	8	7
Wikipedia	0	5	1	0	1	0	0	1	1	0	0	0	0	1	0	10	0	8	2
Plastics companies	0	0	0	0	0	1	0	0	0	0	0	0	0	0	0	1	0	0	1
Inventor of plastic-gathering-vortex	0	0	0	0	0	1	0	0	0	0	0	0	0	0	0	1	0	0	1
Own values/identity/experiences	0	0	0	1	0	0	0	0	0	1	0	0	6	0	4	12	8	0	4
Attended debate	0	0	0	1	0	0	0	0	0	0	0	0	0	0	0	1	1	0	0
Fact-checking organisation	0	0	0	1	0	0	0	0	0	5	0	0	0	0	0	6	6	0	0
Campaign material	0	0	0	1	0	0	0	0	0	5	0	0	0	0	0	6	6	0	0
Library	0	0	0	0	0	0	0	1	1	0	0	0	0	0	0	2	0	1	1
Scientific magazines	0	0	0	0	0	0	0	0	1	0	2	1	0	3	1	8	0	5	3
Podcasts/debates	0	0	0	0	0	0	4	0	0	0	1	0	0	0	0	5	4	1	0
Science blogs	0	0	0	0	0	0	0	0	0	0	0	0	0	1	0	1	0	1	0
News aggregator	0	0	0	0	0	0	0	0	0	0	0	0	1	1	0	2	1	1	0
Museums	0	0	0	0	0	0	0	0	0	0	0	0	0	0	1	1	0	0	1
Professional institute/org (not charity, not university)	0	5	0	0	0	0	0	0	0	0	0	0	1	3	0	9	1	8	0
Thinktanks	0	0	0	0	0	0	0	0	0	0	0	0	1	0	0	1	1	0	0
Consultants	0	0	0	0	0	0	0	0	0	0	0	0	0	0	1	1	0	0	1
Trade union	0	0	0	0	0	0	0	0	0	0	0	0	1	0	0	1	1	0	0
'Astrologers, tea leaves + sears’	0	0	0	0	0	0	0	0	0	0	0	0	1	0	0	1	1	0	0
GP/NHS	0	12	9	0	0	0	0	0	0	0	0	0	0	0	0	21	0	12	9
Support group	0	3	2	0	0	0	0	0	0	0	0	0	0	0	0	5	0	3	2
Archives/historian	0	0	3	0	0	0	0	0	0	0	0	0	0	0	0	3	0	0	3
Theologian	0	0	1	0	0	0	0	0	0	0	0	0	0	0	0	1	0	0	1
Herbalist	0	0	1	0	0	0	0	0	0	0	0	0	0	0	0	1	0	0	1
Leper colonies	0	0	1	0	0	0	0	0	0	0	0	0	0	0	0	1	0	0	1
EU plaques on buildings	1	0	0	0	0	0	0	0	0	0	0	0	0	0	0	1	1	0	0
Historical perspectice	1	0	0	0	0	0	0	0	0	0	0	0	0	0	0	1	1	0	0
Opposing voices	1	0	0	0	0	0	0	0	0	0	0	0	0	0	0	1	1	0	0
TOTAL	40	44	27	43	41	31	40	33	29	23	22	15	49	59	33	519	210	188	121
Number of participants	10	10	9	8	8	8	8	8	8	7	6	5	7	8	7
Sources/participant	4	4.4	3	5.375	5.125	3.875	5	4.125	3.625	3.28571	3.66667	3	7	7.375	4.71429
										Exeter data disregarded as one journalist/media group member was not a participant
Mean number of sources of information per person at each workshop
	Penryn	Redruth	Penzance	Exeter	Plymouth	Total
Science researchers – non-science question	4	5.375	5	3.286	7	4.9322
Science researchers – science question	4.4	5.125	4.125	3.667	7.375	4.9384
Non academic science researcher group – science question	3	3.875	3.625	3	4.714	3.6428
